# Supplementary material for: Milk Fat Globules Hamper Adhesion of Enterohemorrhagic Escherichia coli to Enterocytes: In Vitro and in Vivo Evidence
Source: PubMed Central journal article supplement (PMC5963252; doi:10.3389/fmicb.2018.00947), 2018-05-15
Supplement: Data_Sheet_1.pdf [file Data_Sheet_1.pdf]

**Milk Fat Globules Hamper Adhesion of Enterohemorrhagic  
*Escherichia coli* to Enterocytes: *In Vitro* and *In Vivo* Evidence**

Thomas Douëllou<sup>a,b</sup>, Wessam Galia<sup>b</sup>, Stéphane Kerangart<sup>b</sup>, Thierry Marchal<sup>c</sup>, Nadège Milhau<sup>c</sup>, Renaud Bastien<sup>d</sup>, Marion Bouvier<sup>b, e</sup>, Samuel Buff<sup>c</sup>, Marie-Christine Montel<sup>a</sup>, Delphine Sergentet-Thevenot<sup>b, e#</sup>.

**SUPPLEMENTARY DATA**

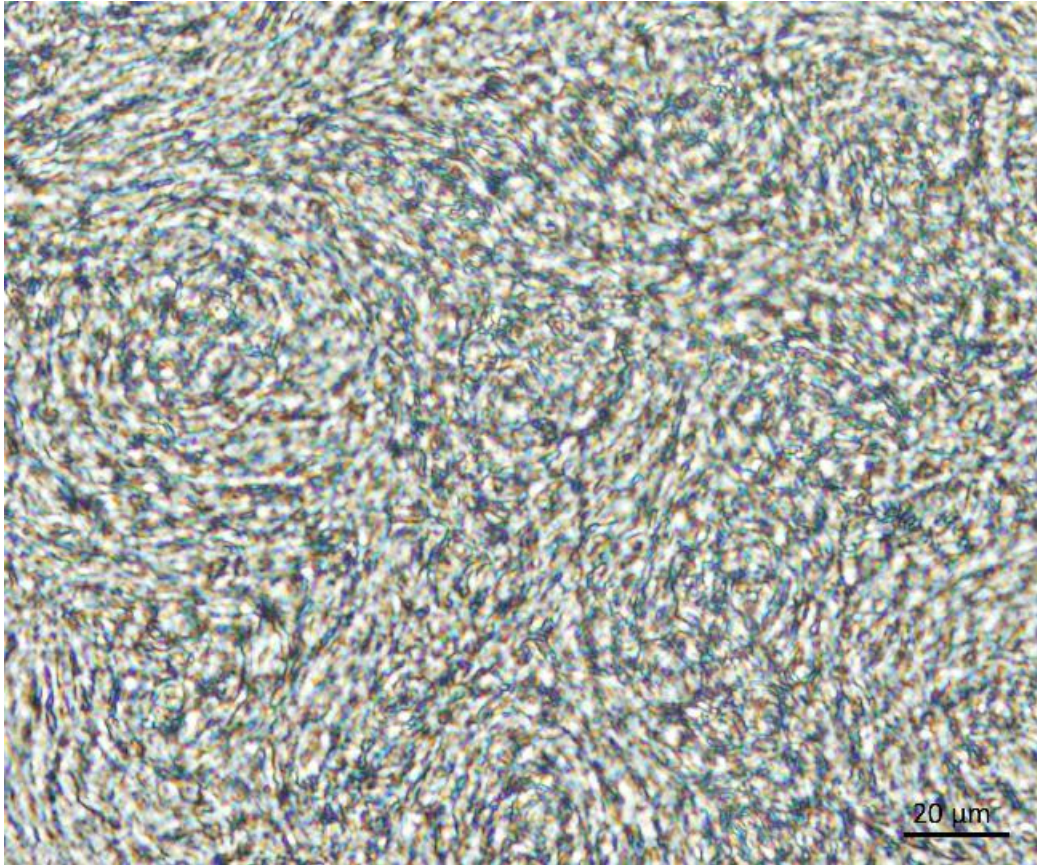

**Figure S1:** Micrograph of Caco-2/HT-29 MTX monolayer co-cultured *in vitro* negative control for cells monolayer integrity and mucus production verification.

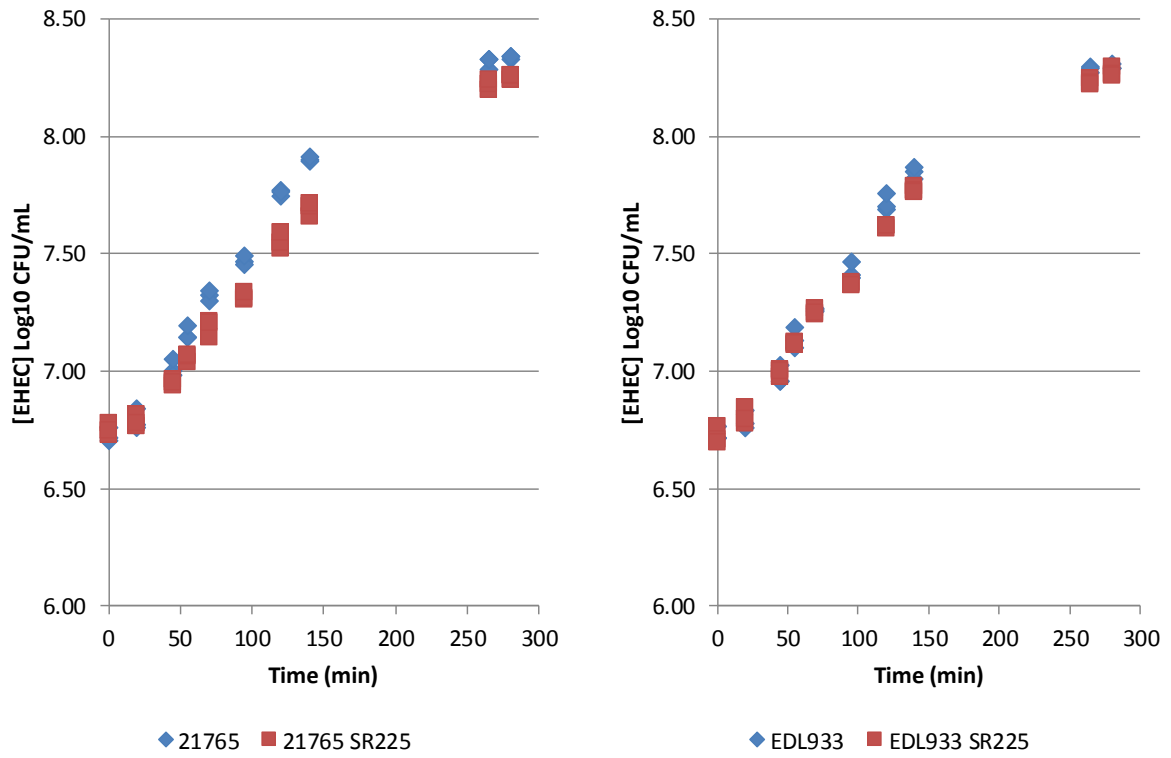

**Figure S2:** Growth rate of Streptomycin Resistant EHEC strains EDL933 SR225 and 21765 SR225 compared to parental strains.

| <b>Microorganism</b>      | <b>Selective medium</b>                                                | <b>Incubation</b> |
|---------------------------|------------------------------------------------------------------------|-------------------|
| EHEC strains              | Coli ID medium + 100 µg/mL of Streptomycin sulfate                     | 1 day, 42 °C      |
| Thermophiles              | M17 agar                                                               | 3 days, 42 °C     |
| Ripening bacteria         | Cheese ripening bacteria medium                                        | 10 days, 25 °C    |
| Total mesophilic bacteria | Plate count agar + 1% milk                                             | 2 days, 30 °C     |
| Gram negative bacteria    | Plate count agar + 1% milk + 5 mg/l vancomycin + 5 mg/l crystal violet | 2 days, 30 °C     |
| Yeasts/Molds              | Oxytetracycline glucose agar                                           | 2 days, 25 °C     |
| <i>Pseudomonas</i>        | Cetrimid Fucidin Cephalosporin agar                                    | 2 days, 25 °C     |

**Table S1:** Selective media used to enumerate STEC strains and the main cultivable cheese microflora.

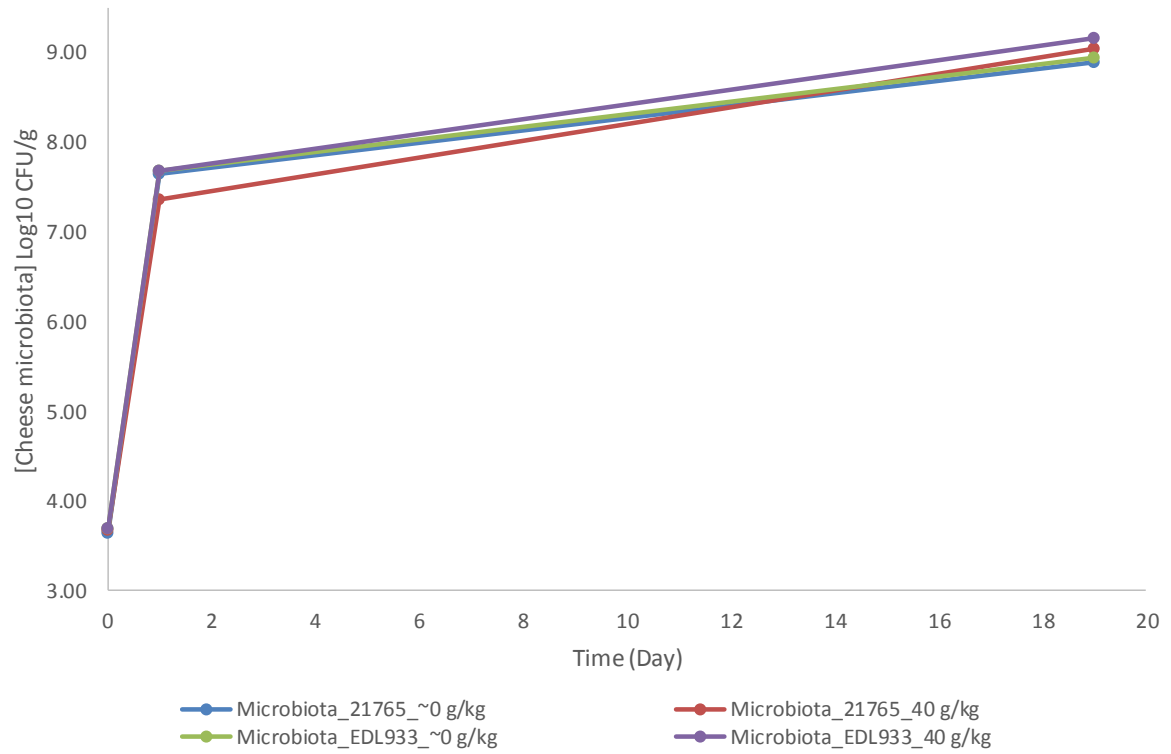

**Figure S3:** Cheese microbiota evolution in ~0.5% or 40% cheese artificially contaminated with EHEC strain EDL933 SR225 or 21765 SR225.

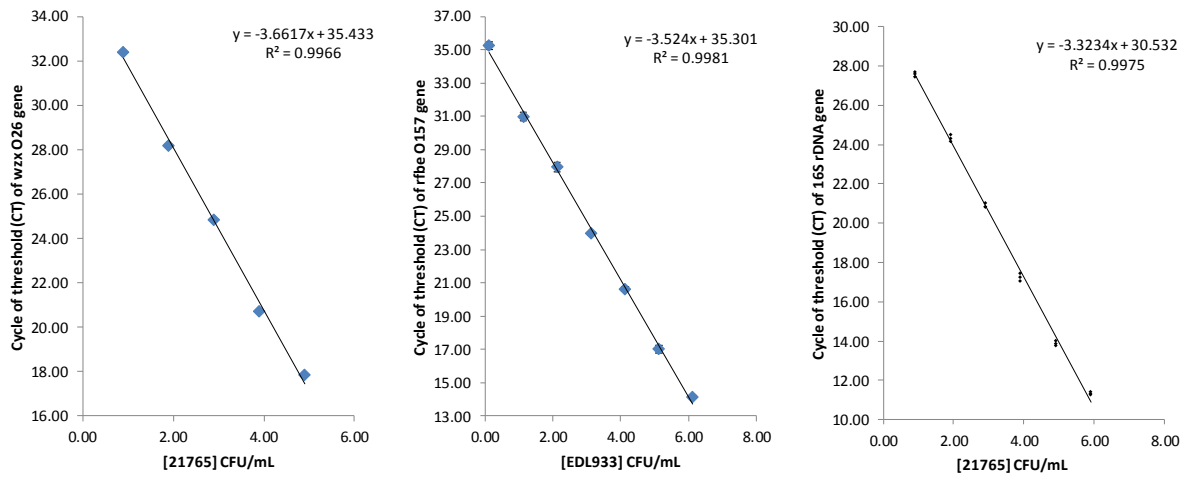

**Figure S4:** Calculation of the equivalent cells in function of the cycle to threshold (Ct) apparition of O-antigen coding gene (*wzx* O26 or *rfbe* O157) or 16S rDNA gene by rt-qPCR.
